# Supplementary material for: Advancing scoping study methodology: a web-based survey and consultation of perceptions on terminology, definition and methodological steps
Source: PubMed Central journal article supplement (PMC4962390; doi:10.1186/s12913-016-1579-z), 2016-07-26

Advancing Scoping Study Methodology: A web-based survey and consultation of perceptions on terminology, definition and methodological steps

## Additional File 2: Scoping Study Consultation Meeting Agenda

| <b>Day 1 - The Scoping Experience, Terminology and Definition</b>                                                                                                                                                               |                                                                                                                                                                                           |                                                                       |
|---------------------------------------------------------------------------------------------------------------------------------------------------------------------------------------------------------------------------------|-------------------------------------------------------------------------------------------------------------------------------------------------------------------------------------------|-----------------------------------------------------------------------|
| Objectives:<br>1) To facilitate <b>knowledge transfer and exchange (KTE)</b> among researchers, clinicians and knowledge users about scoping study methodology.<br>2) Develop a <b>common definition of a 'scoping study'</b> . |                                                                                                                                                                                           |                                                                       |
| <b>Time</b>                                                                                                                                                                                                                     | <b>Topic</b>                                                                                                                                                                              | <b>Speaker</b>                                                        |
| 900-920                                                                                                                                                                                                                         | Welcome and Introductions<br>Why Methodological Quality Criteria for Scoping Studies?<br>Overview of Agenda and Objectives of the Meeting                                                 | Kelly O'Brien,<br>Heather Colquhoun,<br>Danielle Levac                |
| 920-1000                                                                                                                                                                                                                        | <b>Keynote Speaker Session #1 - Overview of Scoping Study Methodology</b> – Development of the Arksey and O'Malley Framework                                                              | <i>Keynote Speaker</i><br>Lisa O'Malley (UK)                          |
| 1000-1020                                                                                                                                                                                                                       | <b>Enhancing Scoping Study Methodology Building on the Arksey and O'Malley Framework</b>                                                                                                  | Danielle Levac                                                        |
| 1020-1040                                                                                                                                                                                                                       | <b>Scoping review of Scoping Reviews</b>                                                                                                                                                  | Mai Pham                                                              |
| 1040-1100                                                                                                                                                                                                                       | <b>Break</b>                                                                                                                                                                              |                                                                       |
| 1100-1230                                                                                                                                                                                                                       | <b>Panel Session - Scoping Studies – Experiences, Strengths, Benefits and Challenges and Strategies for Moving Forward</b><br><br><b>Questions and Facilitated Large Group Discussion</b> | Session Introduction:<br>Kelly O'Brien<br><br>Panelists and Moderator |
| 1230-130                                                                                                                                                                                                                        | <b>Lunch</b>                                                                                                                                                                              |                                                                       |
| 130-150                                                                                                                                                                                                                         | <b>Scoping Reviews: Where Do They Sit on the Spectrum of Knowledge Syntheses?</b>                                                                                                         | Andrea Tricco                                                         |
| 150-210                                                                                                                                                                                                                         | <b>Introduction to Establishing a Common Definition and Terminology of Scoping Studies / Reviews</b>                                                                                      | Danielle Levac,<br>Kelly O'Brien                                      |
| 210-315                                                                                                                                                                                                                         | <b>Small Group Breakout Session –Strengths and Challenges of Scoping Studies &amp; Developing a Definition and Terminology</b>                                                            | Small Groups                                                          |
| 315-330                                                                                                                                                                                                                         | <b>Break</b>                                                                                                                                                                              |                                                                       |
| 330-430                                                                                                                                                                                                                         | <b>Reporting Back to the Large Group – Large Group Discussion</b>                                                                                                                         | Kelly O'Brien,<br>Danielle Levac                                      |
| 430-500                                                                                                                                                                                                                         | <b>Summary and Recommendations for Next Steps<br/>Wrap Up and Evaluation of Day 1</b>                                                                                                     | Lisa O'Malley                                                         |

Advancing Scoping Study Methodology: A web-based survey and consultation of perceptions on terminology, definition and methodological steps

## Additional File 2: Scoping Study Consultation Meeting Agenda

| Day 2 – Methodological Steps to Scoping Studies                                                               |                                                                                                                                                                               |                                                          |
|---------------------------------------------------------------------------------------------------------------|-------------------------------------------------------------------------------------------------------------------------------------------------------------------------------|----------------------------------------------------------|
| Objectives:                                                                                                   |                                                                                                                                                                               |                                                          |
| 1) To establish consensus on the <b>methodological steps</b> for conducting scoping studies.                  |                                                                                                                                                                               |                                                          |
| 2) To <b>determine the process</b> for the development, pilot testing and validation of the quality criteria; |                                                                                                                                                                               |                                                          |
| 3) To develop an <b>international collaborative on scoping study methodology</b> .                            |                                                                                                                                                                               |                                                          |
| Time                                                                                                          | Topic                                                                                                                                                                         | Speaker                                                  |
| 900-910                                                                                                       | <b>Welcome and Review of Day 1<br/>Overview of Day 2 Agenda &amp; Review of the Common Characteristics of a Definition based on the Day 1 Discussion</b>                      | Heather Colquhoun                                        |
| 910-950                                                                                                       | <b><u>Keynote Speaker Session #2:</u> Results from a Knowledge Synthesis on Scoping Studies and Methodology Quality</b>                                                       | <i>Keynote Speakers</i><br>Wasifa Zarin &<br>Erin Lillie |
| 950-1030                                                                                                      | <b><u>Keynote Speaker Session #3</u> –What is EQUATOR and What Are the Considerations for Developing Health Research Reporting Guidelines</b>                                 | <i>Keynote Speaker</i><br>David Moher                    |
| 1030-1045                                                                                                     | <b>Break</b>                                                                                                                                                                  |                                                          |
| 1045-1230                                                                                                     | <b>Introduction: Establishing Methodological Steps for Conducting Scoping Studies (Modified Delphi and Large Group Discussion)</b>                                            | Heather Colquhoun,<br>Andrea Tricco                      |
| 1230-1300                                                                                                     | <b>Lunch</b>                                                                                                                                                                  |                                                          |
| 130-300                                                                                                       | <b>Establishing Consensus on the Methodological Steps for Conducting Scoping Studies – Large Group Discussion Continued - Delphi</b>                                          | Heather Colquhoun,<br>Andrea Tricco                      |
| 300-315                                                                                                       | <b>Break</b>                                                                                                                                                                  |                                                          |
| 315-345                                                                                                       | <b>Bringing it all Together – Next Steps - Developing the Plan for the Development of the Methodological Criteria, Future Pilot Testing and Validation</b>                    | Andrea Tricco                                            |
| 345-415                                                                                                       | <b>Knowledge Translation and Exchange Strategy – Translating the Methodological Steps of Scoping Studies &amp; Sustainability of a Network of Interest in Scoping Studies</b> | Heather Colquhoun<br>Kelly O’Brien,<br>Danielle Levac    |
| 415-430                                                                                                       | <b>Wrap-Up, Acknowledgements and Evaluation</b>                                                                                                                               | Heather Colquhoun,<br>Danielle Levac,<br>Kelly O’Brien   |

### Acknowledgements

The Meeting to Advance Scoping Studies Methodology was funded by a Planning Grant from the Canadian Institutes of Health Research (CIHR).

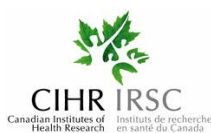

Supplement: 12913_2016_1579_MOESM2_ESM.pdf [file 12913_2016_1579_MOESM2_ESM.pdf]
